# Supplementary material for: Characteristics of Particulate Matter at Different Pollution Levels in Chengdu, Southwest of China
Source: MDPI journal article supplement (doi:10.3390/atmos12080990), 2021-07-31
Supplement: s1 [file s1]

## *Supplementary information for*

### **Characteristics of Particulate Matter at Different Pollution Levels in Chengdu, Southwest of China**

Yi Huang<sup>#a,b</sup>, Li Wang<sup>#a</sup>, Xin Cheng<sup>b</sup>, Jinjin Wang<sup>b</sup>, Ting Li<sup>b</sup>, Min He<sup>b</sup>, Huibin Shi<sup>b</sup>, Meng Zhang<sup>b</sup> Scott S. Hughes<sup>c</sup>, Shijun Ni<sup>b</sup>

<sup>#</sup>These authors contributed equally to this work and should be considered dual-first authors

<sup>a</sup> State Key Laboratory of Geohazard Prevention and Geoenvironment Protection, College of Ecology and Environment, Chengdu University of Technology, Sichuan 610059, China

<sup>b</sup> Department of Geochemistry, Chengdu University of Technology, China

<sup>c</sup> Department of Geosciences, Idaho State University, ID, USA

\*Correspondence: [huangyi@cdut.edu.cn](mailto:huangyi@cdut.edu.cn)

**Number of figures: 2**

**Number of tables: 4**

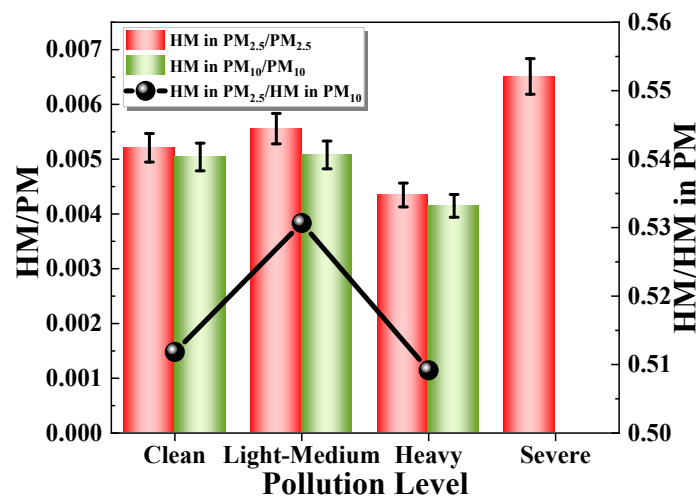

Figure S1.Changes of heavy metals per particle at different pollution levels

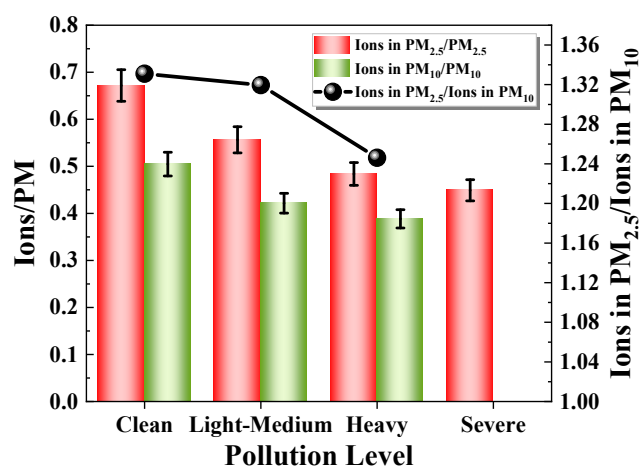

Figure S2. Change in ions per particle at different pollution levels

**Table S1**Average mass concentrations of heavy metals in PM<sub>2.5</sub> at different pollution levels (ng/m<sup>3</sup>)

| Level        |         | As    | Cd   | Cr     | Cu     | Ni     | Pb     | V    | Zn     |
|--------------|---------|-------|------|--------|--------|--------|--------|------|--------|
| Clean        | Max     | 22.73 | 1.56 | 31.84  | 144.52 | 9.24   | 92.77  | 1.87 | 387.73 |
|              | Min     | 2.04  | 0.02 | 1.67   | 15.53  | 0.01   | 12.93  | 0.14 | 79.56  |
|              | Average | 6.61  | 0.44 | 8.91   | 42.20  | 2.65   | 31.76  | 0.92 | 160.63 |
|              | SD      | 4.76  | 0.42 | 8.34   | 35.93  | 2.84   | 19.79  | 0.52 | 80.93  |
| Light-Medium | Max     | 63.32 | 3.13 | 372.04 | 474.83 | 188.08 | 587.97 | 3.43 | 950.76 |
|              | Min     | 2.19  | 0.06 | 3.02   | 22.71  | 1.29   | 16.66  | 0.34 | 21.95  |
|              | Average | 17.41 | 1.18 | 40.02  | 120.66 | 15.67  | 92.64  | 1.26 | 321.56 |
|              | SD      | 14.38 | 0.75 | 79.30  | 123.56 | 40.77  | 125.52 | 0.80 | 241.56 |
| Heavy        | Max     | 49.63 | 5.26 | 49.01  | 658.49 | 18.50  | 169.31 | 2.47 | 866.01 |
|              | Min     | 7.66  | 0.80 | 8.69   | 51.47  | 3.06   | 42.34  | 0.17 | 178.41 |
|              | Average | 24.13 | 2.00 | 25.22  | 204.49 | 8.48   | 95.34  | 1.54 | 447.94 |
|              | SD      | 16.09 | 1.20 | 12.94  | 188.02 | 4.95   | 40.02  | 0.62 | 228.78 |

SD means standard deviation.

Table S2. Average mass concentrations of heavy metals in PM<sub>10</sub> at different pollution levels (ng/m<sup>3</sup>)

| Level        |         | As    | Cd   | Cr    | Cu      | Ni    | Pb     | V     | Zn      |
|--------------|---------|-------|------|-------|---------|-------|--------|-------|---------|
| Clean        | Max     | 31.81 | 1.81 | 56.90 | 697.93  | 13.26 | 116.10 | 10.40 | 763.15  |
|              | Min     | 3.27  | 0.17 | 6.90  | 28.03   | 1.94  | 15.86  | 1.35  | 71.98   |
|              | Average | 9.44  | 0.81 | 19.38 | 138.77  | 5.61  | 43.53  | 4.03  | 274.93  |
|              | SD      | 8.44  | 0.58 | 14.70 | 186.90  | 3.73  | 31.00  | 2.61  | 180.63  |
| Light-Medium | Max     | 79.94 | 6.72 | 77.64 | 1752.64 | 23.01 | 679.46 | 17.44 | 1572.08 |
|              | Min     | 3.45  | 0.34 | 9.22  | 30.81   | 2.78  | 27.15  | 1.97  | 119.90  |
|              | Average | 25.45 | 1.88 | 35.87 | 393.02  | 10.26 | 128.28 | 8.32  | 547.16  |
|              | SD      | 19.69 | 1.35 | 22.32 | 438.03  | 5.85  | 127.63 | 4.10  | 356.08  |
| Heavy        | Max     | 95.24 | 3.84 | 51.39 | 1348.96 | 13.08 | 289.37 | 10.84 | 1209.15 |
|              | Min     | 12.01 | 1.11 | 27.61 | 133.71  | 8.66  | 85.59  | 5.51  | 391.94  |
|              | Average | 41.72 | 2.29 | 39.39 | 580.20  | 10.26 | 159.51 | 8.66  | 747.13  |
|              | SD      | 46.45 | 1.41 | 11.89 | 668.66  | 2.45  | 112.82 | 2.79  | 418.95  |

SD means standard deviation

**Table S3.** Average mass concentration of ions in PM<sub>2.5</sub> at different pollution levels (µg/m<sup>3</sup>)

| Level        |         | F <sup>-</sup> | Cl <sup>-</sup> | NO <sub>3</sub> <sup>-</sup> | SO <sub>4</sub> <sup>2-</sup> | Na <sup>+</sup> | NH <sub>4</sub> <sup>+</sup> | K <sup>+</sup> | Ca <sup>2+</sup> | Mg <sup>2+</sup> |
|--------------|---------|----------------|-----------------|------------------------------|-------------------------------|-----------------|------------------------------|----------------|------------------|------------------|
| Clean        | Max     | 0.35           | 2.55            | 14.36                        | 28.10                         | 1.97            | 15.43                        | 2.23           | 1.23             | 0.19             |
|              | Min     | 0.03           | 0.54            | 3.63                         | 6.57                          | 0.04            | 0.85                         | 0.47           | 0.01             | 0.02             |
|              | Average | 0.08           | 1.13            | 7.64                         | 14.73                         | 0.83            | 6.92                         | 1.08           | 0.30             | 0.08             |
|              | SD      | 0.07           | 0.60            | 3.12                         | 5.27                          | 0.66            | 4.01                         | 0.46           | 0.36             | 0.04             |
| Light-Medium | Max     | 0.25           | 4.10            | 23.88                        | 51.30                         | 1.95            | 20.96                        | 22.82          | 1.46             | 0.21             |
|              | Min     | 0.05           | 0.69            | 5.37                         | 10.49                         | 0.04            | 4.95                         | 0.89           | 0.01             | 0.02             |
|              | Average | 0.12           | 2.32            | 13.85                        | 27.36                         | 0.63            | 13.49                        | 2.77           | 0.46             | 0.10             |
|              | SD      | 0.05           | 1.03            | 4.18                         | 10.51                         | 0.52            | 4.14                         | 4.87           | 0.36             | 0.04             |
| Heavy        | Max     | 0.34           | 5.60            | 37.91                        | 62.27                         | 1.89            | 34.06                        | 2.32           | 1.14             | 0.17             |
|              | Min     | 0.04           | 0.62            | 3.23                         | 5.33                          | 0.02            | 8.58                         | 1.05           | 0.07             | 0.04             |
|              | Average | 0.16           | 3.35            | 23.35                        | 37.13                         | 0.69            | 23.19                        | 1.71           | 0.44             | 0.10             |
|              | SD      | 0.08           | 1.50            | 11.16                        | 19.28                         | 0.66            | 6.76                         | 0.39           | 0.28             | 0.04             |

SD means standard deviation.

**Table S4.** Average mass concentration of ions in PM<sub>10</sub> at different pollution levels (µg/m<sup>3</sup>)

| Level        |         | F <sup>-</sup> | Cl <sup>-</sup> | NO <sub>3</sub> <sup>-</sup> | SO <sub>4</sub> <sup>2-</sup> | Na <sup>+</sup> | NH <sub>4</sub> <sup>+</sup> | K <sup>+</sup> | Ca <sup>2+</sup> | Mg <sup>2+</sup> |
|--------------|---------|----------------|-----------------|------------------------------|-------------------------------|-----------------|------------------------------|----------------|------------------|------------------|
| Clean        | Max     | 0.60           | 4.05            | 21.15                        | 28.53                         | 1.96            | 13.30                        | 12.64          | 10.07            | 0.49             |
|              | Min     | 0.12           | 0.95            | 5.94                         | 16.83                         | 0.08            | 2.56                         | 1.02           | 1.28             | 0.05             |
|              | Average | 0.28           | 1.87            | 11.78                        | 20.62                         | 0.89            | 6.45                         | 2.60           | 5.00             | 0.22             |
|              | SD      | 0.15           | 0.94            | 3.74                         | 3.27                          | 0.65            | 2.65                         | 2.96           | 2.50             | 0.13             |
| Light-Medium | Max     | 1.25           | 8.86            | 53.62                        | 58.64                         | 15.12           | 70.22                        | 15.17          | 12.47            | 0.93             |
|              | Min     | 0.06           | 0.89            | 5.26                         | 15.17                         | 0.09            | 0.72                         | 0.74           | 0.20             | 0.04             |
|              | Average | 0.47           | 4.06            | 26.16                        | 32.48                         | 1.66            | 19.20                        | 4.14           | 7.01             | 0.33             |
|              | SD      | 0.30           | 2.34            | 13.05                        | 10.61                         | 2.49            | 14.42                        | 2.81           | 3.10             | 0.19             |
| Heavy        | Max     | 0.99           | 10.46           | 68.40                        | 47.33                         | 1.76            | 44.51                        | 7.86           | 12.09            | 0.67             |
|              | Min     | 0.32           | 4.41            | 37.00                        | 31.87                         | 0.30            | 21.69                        | 3.33           | 8.85             | 0.12             |
|              | Average | 0.76           | 7.14            | 49.85                        | 41.64                         | 1.00            | 32.68                        | 5.09           | 10.18            | 0.46             |
|              | SD      | 0.38           | 3.07            | 16.45                        | 8.50                          | 0.73            | 11.43                        | 2.43           | 1.70             | 0.30             |

SD means standard deviation.
